# Supplementary material for: MXene/CdS photothermal–photocatalytic hydrogels for efficient solar water evaporation and synergistic degradation of VOC
Source: Royal Society of Chemistry journal article supplement (doi:10.1039/d4ta00038b), 2024-01-01
Supplement: d4ta00038b1.pdf [file d4ta00038b1.pdf]

## Supporting Information

### **MXene/CdS photothermal-photocatalytic hydrogel for efficient solar water evaporation and synergistic degradation of VOC**

Zhen-Yu Wang <sup>a</sup>, Lei Xu <sup>a</sup>, Cai-Hua Liu <sup>a</sup>, Sheng-Jie Han <sup>a</sup>, Ming-Lai Fu <sup>a,\*</sup>, Baoling Yuan <sup>ab,\*</sup>

<sup>a</sup> Xiamen Key Laboratory of Municipal and Industrial Solid Waste Utilization and Pollution Control,

College of Civil Engineering, Huaqiao University, Xiamen, Fujian 361021, P.R. China

<sup>b</sup> Key Laboratory of Songliao Aquatic Environment, Ministry of Education, Jilin Jianzhu University,

Changchun, 130118, P.R. China

\*Corresponding author. Tel.: +86 592 6162705; fax: +86 592 6162705.

E-mail addresses: mlfu@iue.ac.cn (M.-L. Fu); mlfu@hqu.edu.cn.

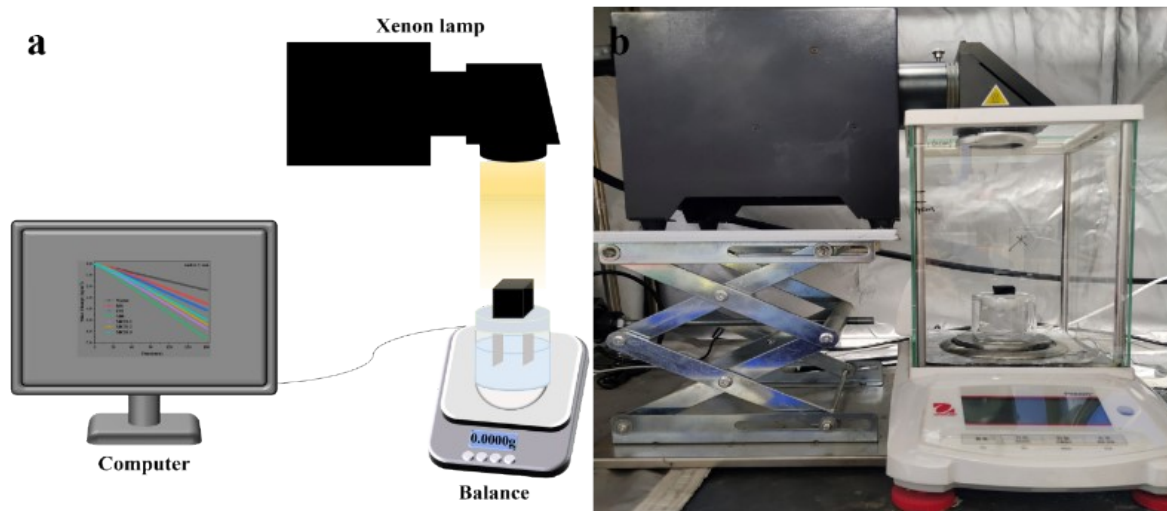

**Fig. S1.** (a) Schematic and (b) a digital photo of solar-driven interfacial water evaporation device.

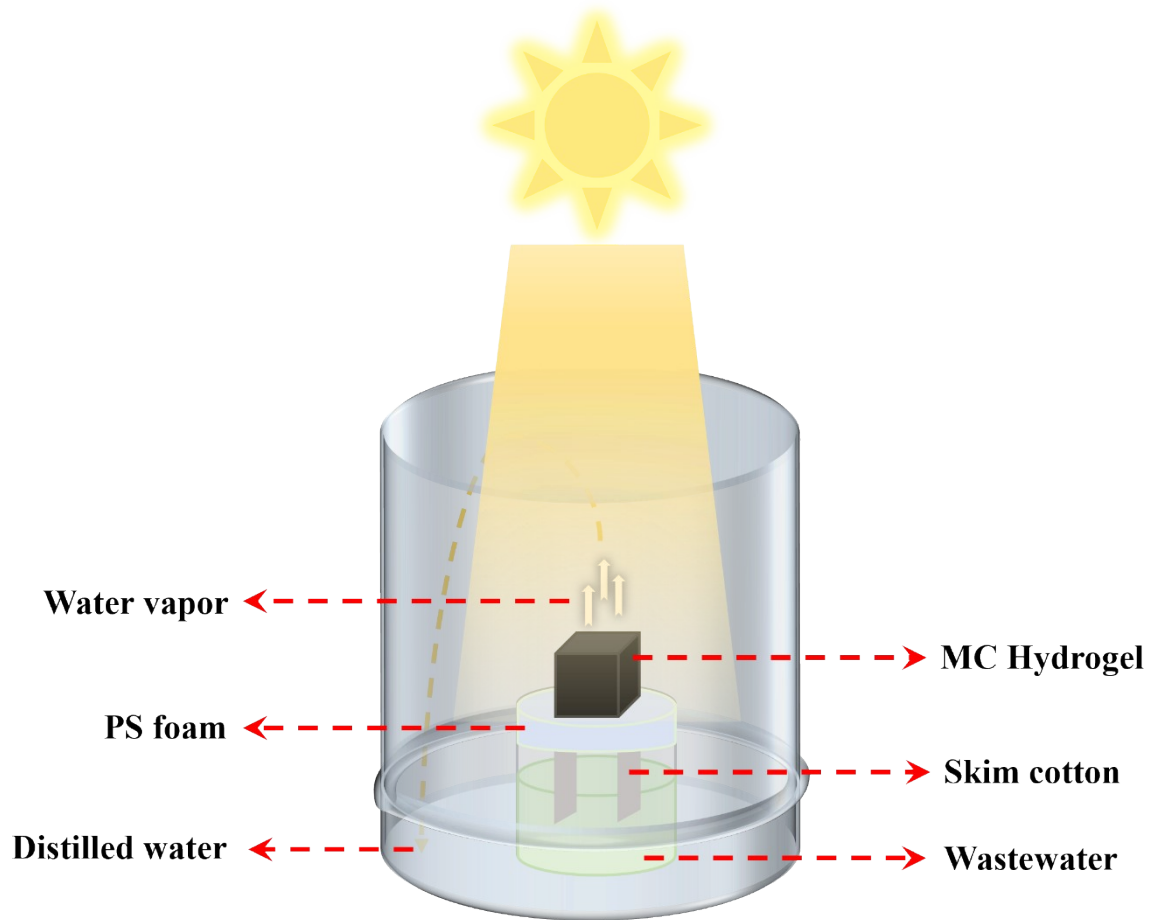

**Fig. S2.** Schematic of laboratory-made distilled water collection device and internal evaporator.

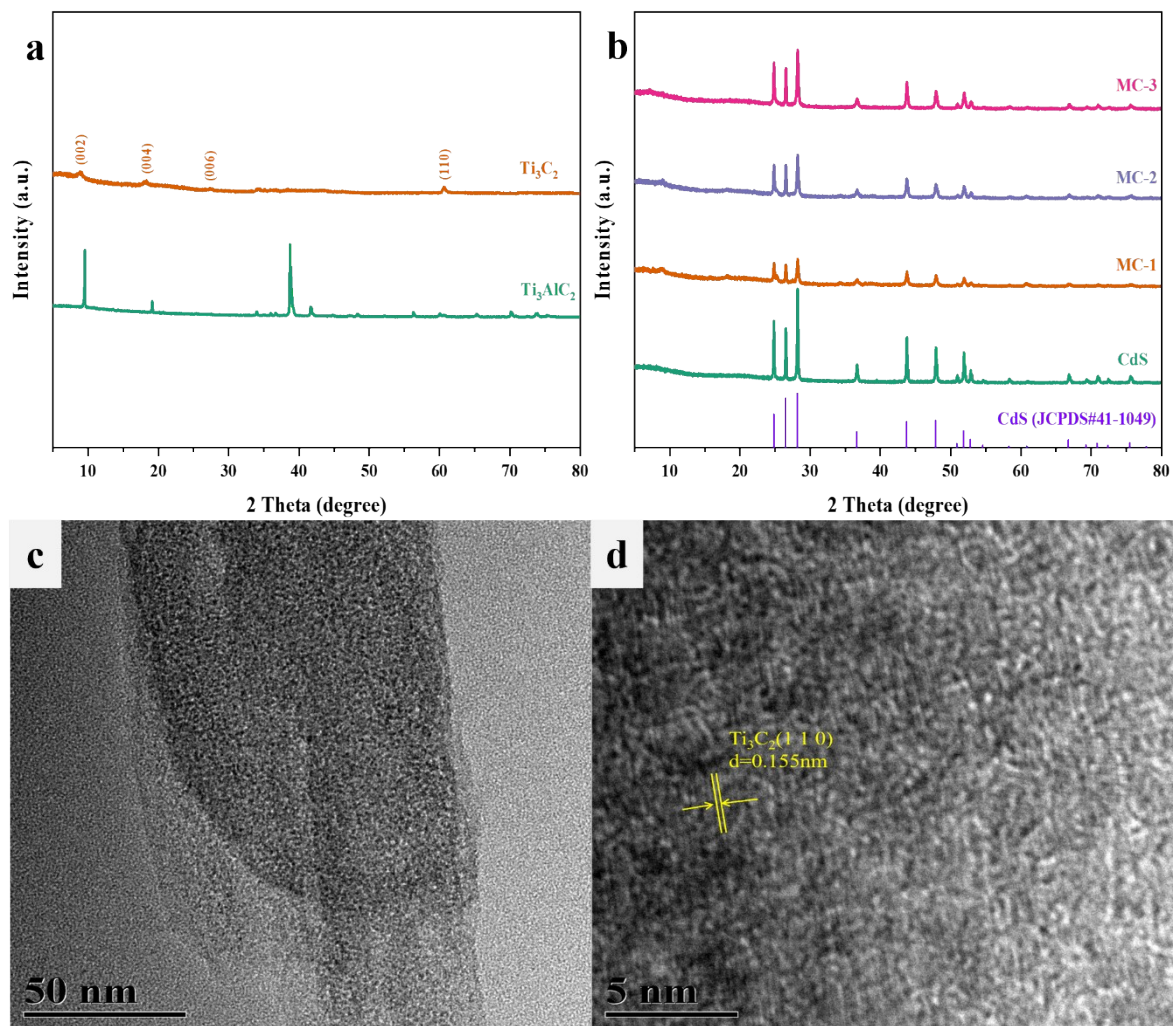

**Fig. S3.** XRD spectra of (a)  $\text{Ti}_3\text{C}_2$  and  $\text{Ti}_3\text{AlC}_2$ , (b) CdS and MC composites. (c-d) TEM and HRTEM images of  $\text{Ti}_3\text{C}_2$  MXene.

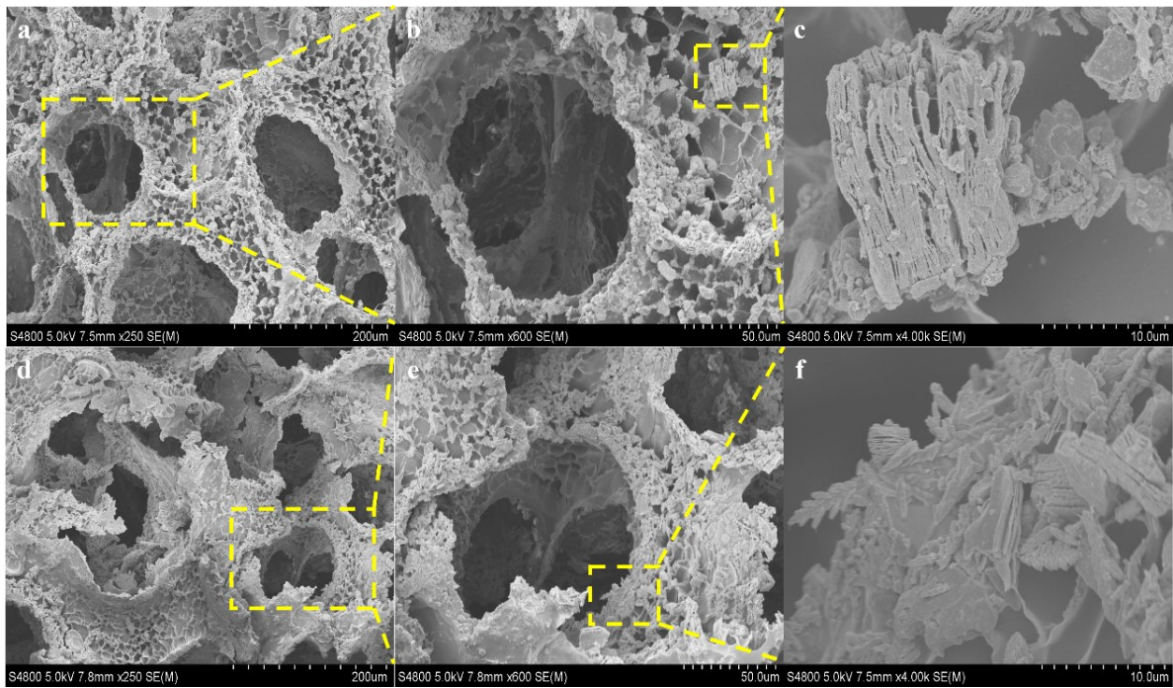

**Fig. S4.** SEM images of (a-c) MCH-1 and (d-f) MCH-3.

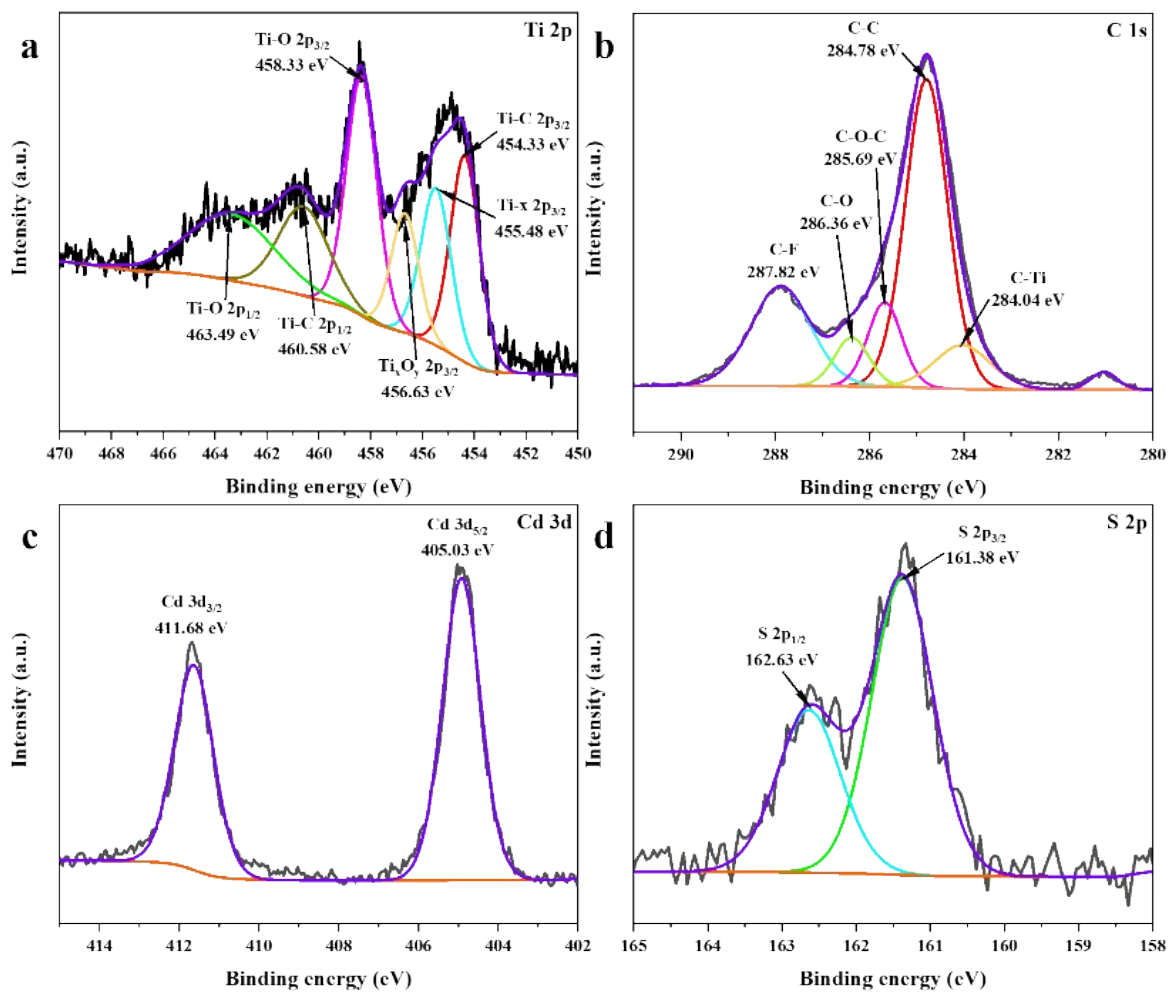

**Fig. S5.** XPS spectra of MC composites: (a) Ti 2p, (b) C 1s, (c) Cd 3d, and (d) S 2p.

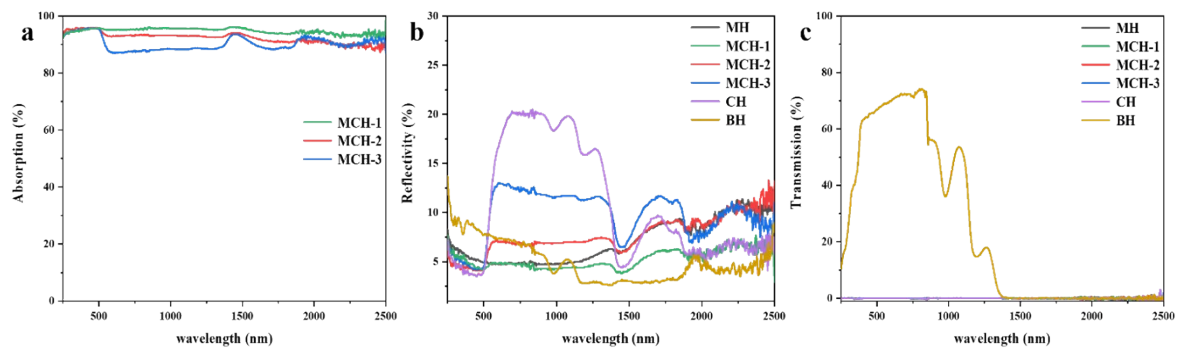

**Fig. S6.** UV/Vis-NIR (a) absorption, (b) reflection, and (c) projection spectra of MCHs.

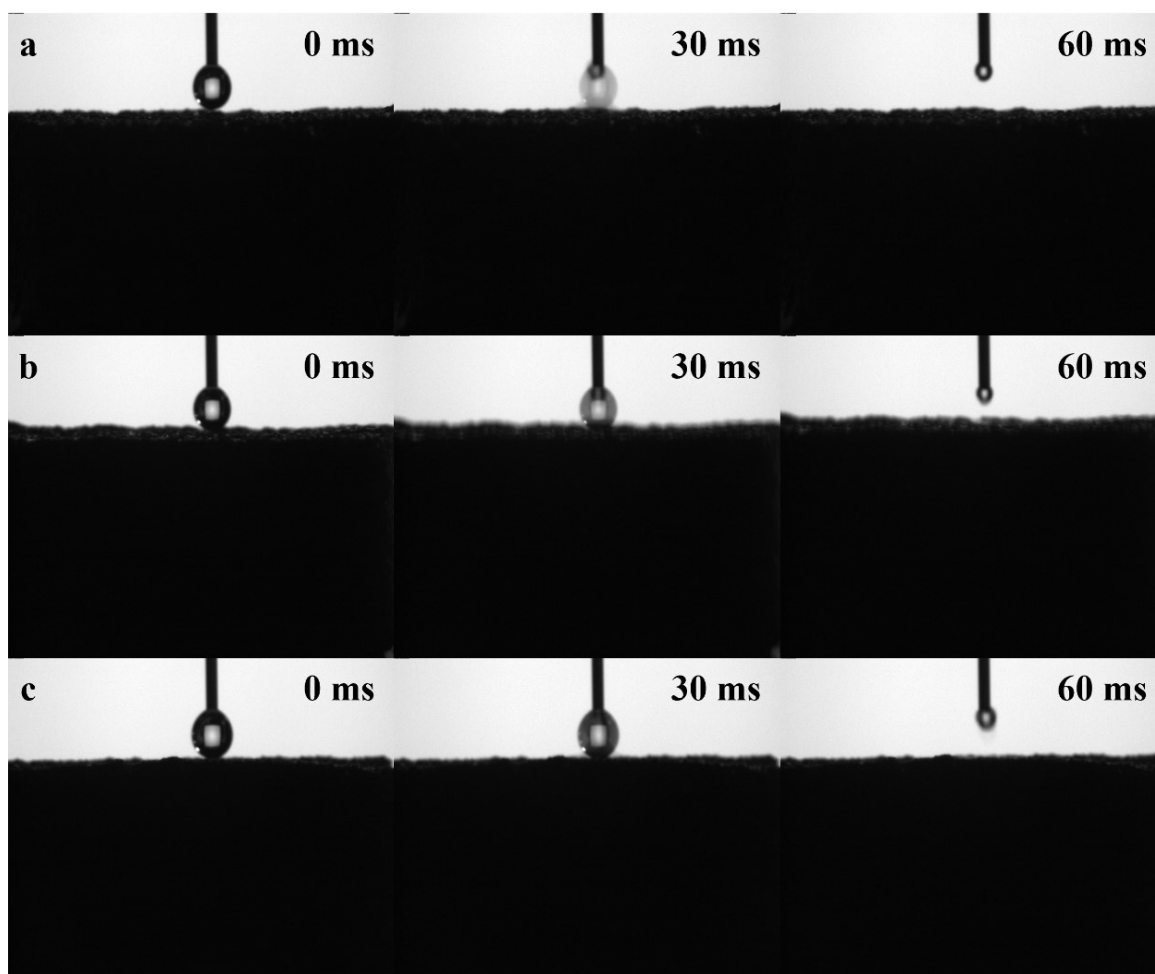

**Fig. S7.** Surface wettability of (a) MH, (b) MCH-1, and (c) MCH-3 at different contact times.



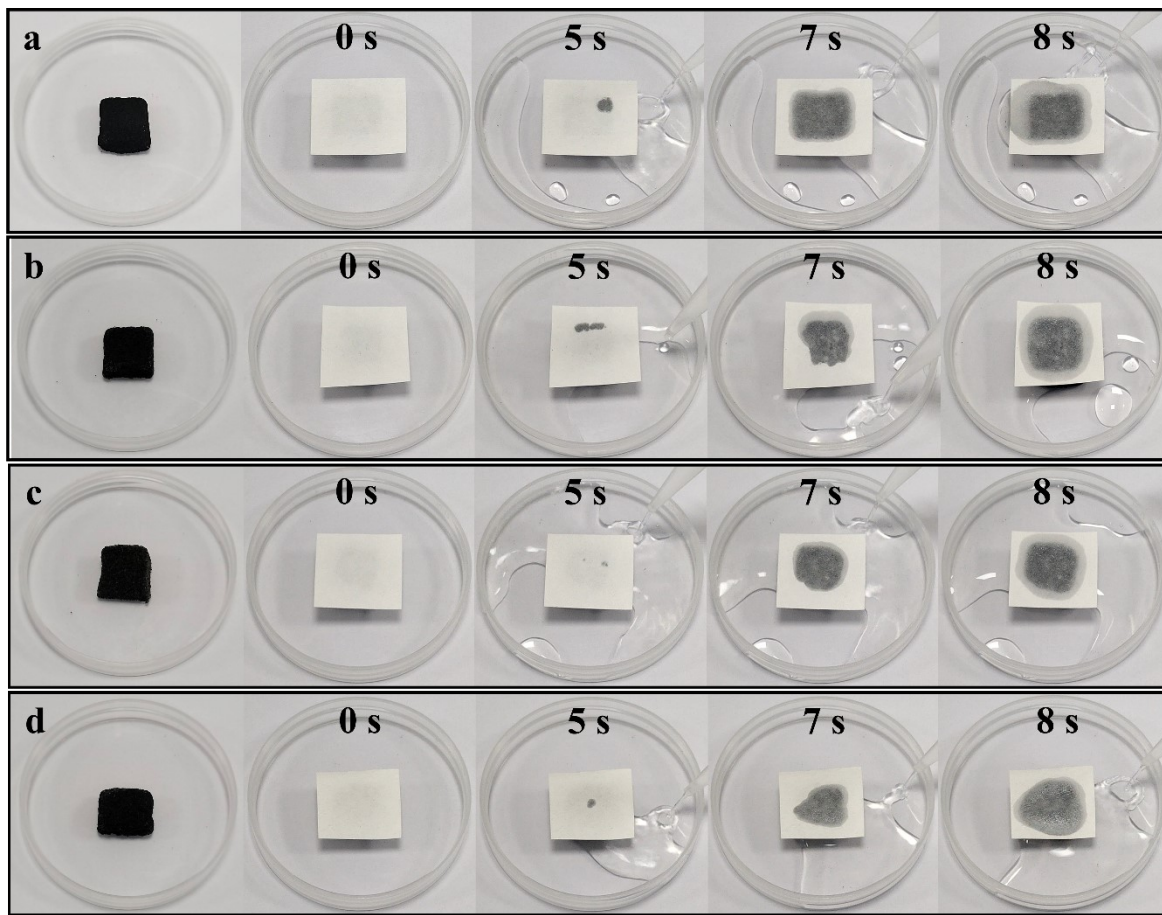

**Fig. S8.** Water pumping with (a) MH, (b) MCH-1, (c) MCH-2, and (d) MCH-3 and distribution on white cellulose paper at different times.

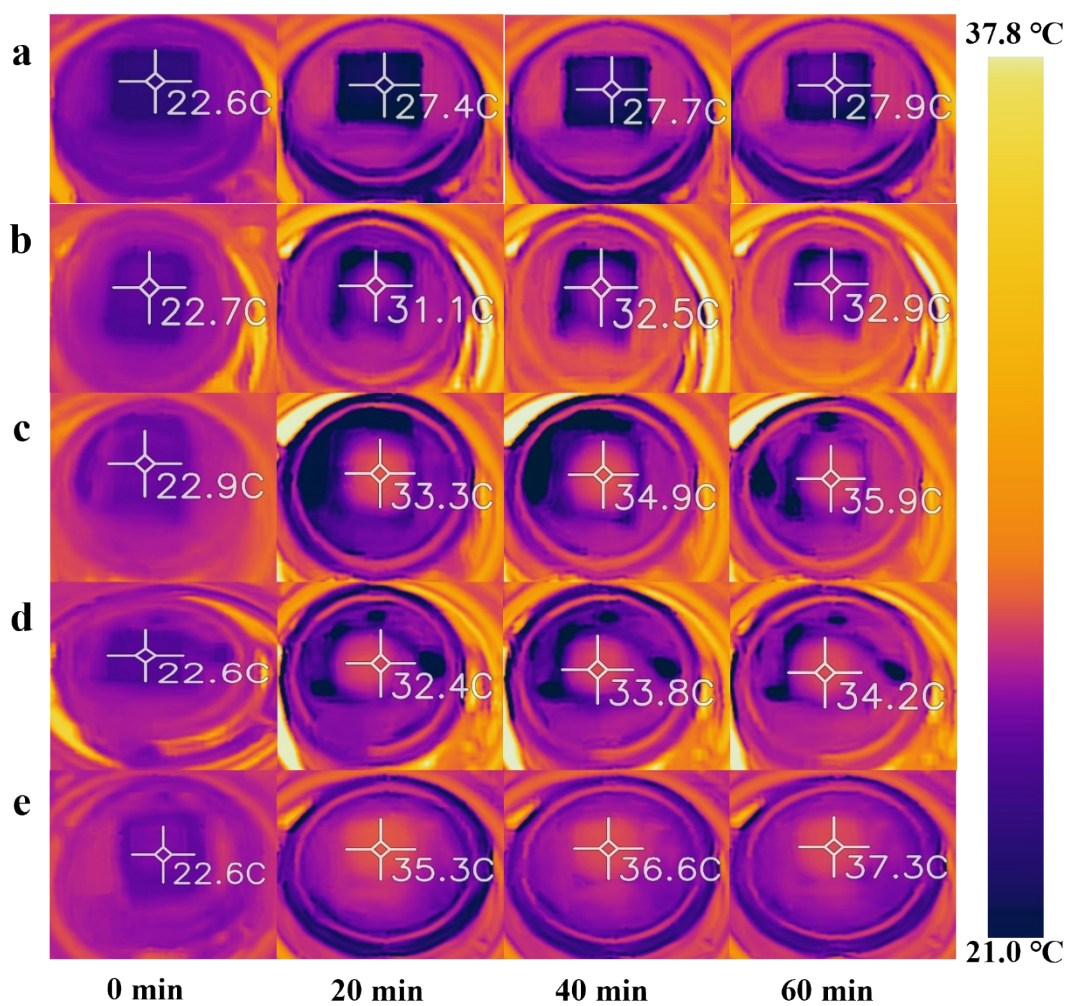

**Fig. S9.** Infrared images of (a) BH, (b) CH, (c) MCH-1, (d) MCH-3, and (e) MH at different time points under 1.0 sun.

**S1.** Calculation of the equivalent evaporation enthalpy of water in hydrogels.

The evaporation enthalpy is determined by using the dark state equivalence method. The mass changes of hydrogels and pure water were measured after evaporation in a closed dark environment at 25°C, 35% humidity, and normal pressure for 3h. The calculation formula is as follows:

$$\Delta H_{vap} m_0 = \Delta H_{equ} m_g$$

Where  $\Delta H_{vap}$  is the evaporation enthalpy of pure water (2441.7 J g<sup>-1</sup>),  $\Delta H_{equ}$  is the equivalent evaporation enthalpy of water in hydrogels,  $m_0$  and  $m_g$  are the mass changes of pure water and water in hydrogel, respectively.

**Table S1.** Comparison of water evaporation performance with MXene-based solar photothermal evaporation materials in recent literature reports.

| <b>Samples</b>                                                                                  | <b>Morphological structure</b> | <b>Power density (kW m<sup>-2</sup>)</b> | <b>Evaporation rate (kg m<sup>-2</sup> h<sup>-1</sup>)</b> | <b>Ref.</b>      |
|-------------------------------------------------------------------------------------------------|--------------------------------|------------------------------------------|------------------------------------------------------------|------------------|
| MXene/PEI/PDA                                                                                   | Modify melamine foam           | 1                                        | 1.50                                                       | [1]              |
| PI/MXene                                                                                        | Hybrid aerogel                 | 1                                        | 1.24                                                       | [2]              |
| MXene/MMT                                                                                       | Hierarchical binary gel        | 1                                        | 1.37                                                       | [3]              |
| MXene/Melamine foam                                                                             | 3D microporous architectures   | 1                                        | 1.41                                                       | [4]              |
| GO/MXene                                                                                        | 3D porous aerogel              | 1                                        | 1.27                                                       | [5]              |
| MF-MXene/PPy                                                                                    | Porous melamine foam           | 1                                        | 1.52                                                       | [6]              |
| JPP@MXene                                                                                       | 3D porous sponge               | 1                                        | 1.48                                                       | [7]              |
| Carbonized MXene/PDA foam                                                                       | 3D network skeleton            | 1                                        | 1.60                                                       | [8]              |
| Ferrous ion-crosslinked Ti <sub>3</sub> C <sub>2</sub> T <sub>x</sub> MXene-based aerogel films | 2D porous films                | 1                                        | 1.67                                                       | [9]              |
| TiO <sub>2</sub> /Ti <sub>3</sub> C <sub>2</sub> /C <sub>3</sub> N <sub>4</sub> /PVA            | Porous network hydrogel        | 1                                        | 1.54                                                       | [10]             |
| <b>Ti<sub>3</sub>C<sub>2</sub> MXene/CdS</b>                                                    | <b>3D porous hydrogel</b>      | <b>1</b>                                 | <b>1.80</b>                                                | <b>This work</b> |

## References

- 1 D. Jiang, C. J. O. Bacal, K. A. S. Usman, J. Zhang, S. Qin, D. Hegh, W. Lei, J. Liu and J. M. Razal, *Advanced Materials Technologies*, 2023, **8**, 2201611.
- 2 Z. Zheng, H. Liu, D. Wu and X. Wang, *Chemical Engineering Journal*, 2022, **440**, 135862.
- 3 Z. Ai, Y. Zhao, R. Gao, L. Chen, T. Wen, W. Wang, T. Zhang, W. Ge and S. Song, *Journal of Cleaner Production*, 2022, **357**, 132000.
- 4 X. Zhao, X.-J. Zha, J.-H. Pu, L. Bai, R.-Y. Bao, Z.-Y. Liu, M.-B. Yang and W. Yang, *Journal of Materials Chemistry A*, 2019, **7**, 10446-10455.
- 5 X. Ming, A. Guo, Q. Zhang, Z. Guo, F. Yu, B. Hou, Y. Wang, K. P. Homewood and X. Wang, *Carbon*, 2020, **167**, 285-295.
- 6 X. Mu, L. Chen, N. Qu, J. Yu, X. Jiang, C. Xiao, X. Luo and Q. Hasi, *Journal of Colloid and Interface Science*, 2023, **636**, 291-304.
- 7 H.-S. Guan, T.-T. Fan, H.-Y. Bai, Y. Su, Z. Liu, X. Ning, M. Yu, S. Ramakrishna and Y.-Z. Long, *Carbon*, 2022, **188**, 265-275.
- 8 Y. Jin, K. Wang, S. Li and J. Liu, *Journal of Colloid and Interface Science*, 2022, **614**, 345-354.
- 9 X. P. Li, X. Li, H. Li, Y. Zhao, W. Li, S. Yan and Z. Z. Yu, *Advanced Sustainable Systems*, 2021, **5**, 2100263.
- 10 H. Mo and Y. Wang, *Water Research*, 2022, **226**, 119276.

**Table S2.** The evaporation enthalpy of water in MCHs and pure water is calculated.

| <b>Sample</b>                      | Water  | BH     | CH     | MH   | MCH-1  | MCH-2  | MCH-3  |
|------------------------------------|--------|--------|--------|------|--------|--------|--------|
| <b>Enthalpy (J g<sup>-1</sup>)</b> | 2441.7 | 2027.3 | 1891.5 | 1600 | 1661.5 | 1748.8 | 1636.3 |

Note:  $h_{LV}$  and  $\Delta H_{equ}$  are numerically equivalent.
